# Supplementary material for: Atomic layer deposition of lithium zirconium oxides for the improved performance of lithium-ion batteries
Source: Royal Society of Chemistry journal article supplement (doi:10.1039/d1dt03600a), 2022-01-01
Supplement: d1dt03600a1.pdf [file d1dt03600a1.pdf]

## Supporting Information

### Atomic Layer Deposition of Lithium Zirconium Oxides for Improved

### Performance of Lithium-ion Batteries

Yongqiang Liu<sup>1,3</sup>, Xin Wang<sup>1</sup>, Sujan Kumar Ghosh<sup>1,2</sup>, Min Zou<sup>1,2</sup>, Hua Zhou<sup>4</sup>,  
Xianghui Xiao<sup>5\*</sup>, and Xiangbo Meng<sup>1,2\*</sup>

<sup>1</sup>Department of Mechanical Engineering, The University of Arkansas, Fayetteville, AR 72701, USA

<sup>2</sup>The Center for Advanced Surface Engineering, The University of Arkansas, Fayetteville, AR 72701, USA

<sup>3</sup>College of Science, Northeast Forestry University, Harbin 150040, Heilongjiang, China

<sup>4</sup>Advanced Photon Source, Argonne National Laboratory, Lemont, IL 60439, USA

<sup>5</sup>National Synchrotron Light Source II, Brookhaven National Laboratory, Upton, NY 11973, USA

\* Corresponding author: [xbmeng@uark.edu](mailto:xbmeng@uark.edu); [xiao@bnl.gov](mailto:xiao@bnl.gov)

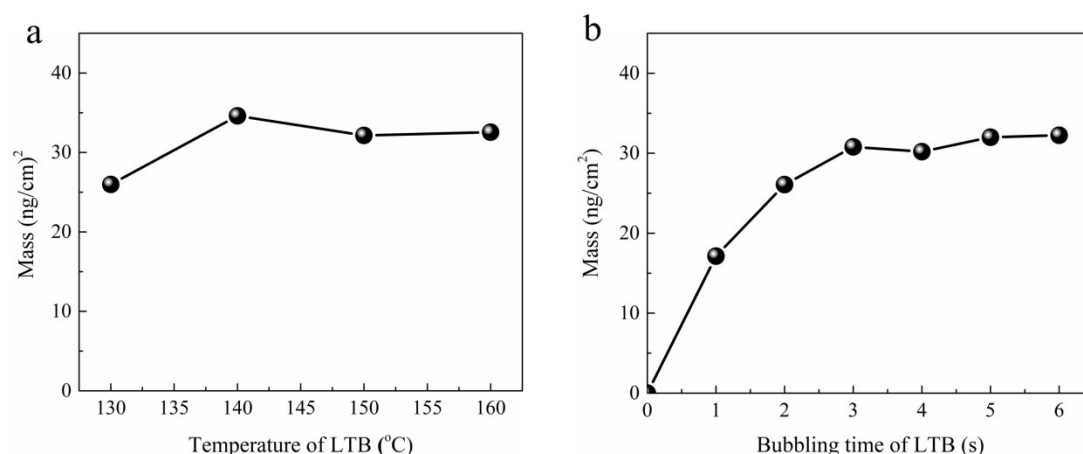

**Figure S1.** The effects of (a) heating temperatures of LTB precursor and (b) dosing times of LTB on the mass gain per cycle of the ALD-LiOH at 225 °C. The timing sequence is LTB ( $t_l$ ) – purge (10 s) – H<sub>2</sub>O (0.015 s) – purge (10 s) for (a) and (b), where  $t_l = 5$  s for (a).

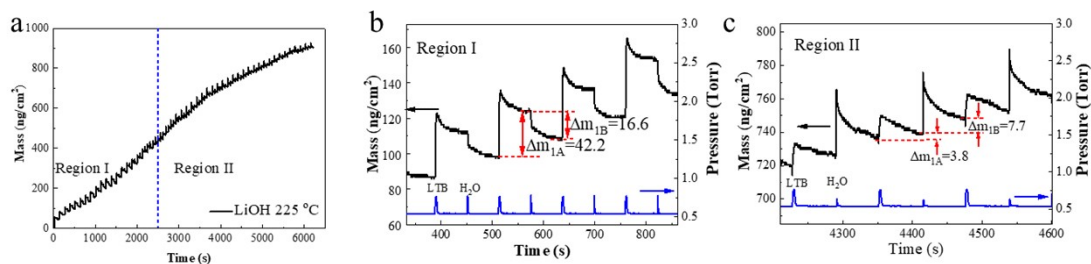

**Figure S2.** *In-situ* QCM measurements of ALD-LiOH using the timing sequence of 3 - 60 - 0.015 - 60 s in correspondence to LTB-purge-H<sub>2</sub>O-purge, respectively, at 225 °C: (a) 50 consecutive cycles, (b) an enlarged view of 3 consecutive cycles in Region I of (a), and (c) an enlarged view of 3 consecutive cycles in Region II of (a).

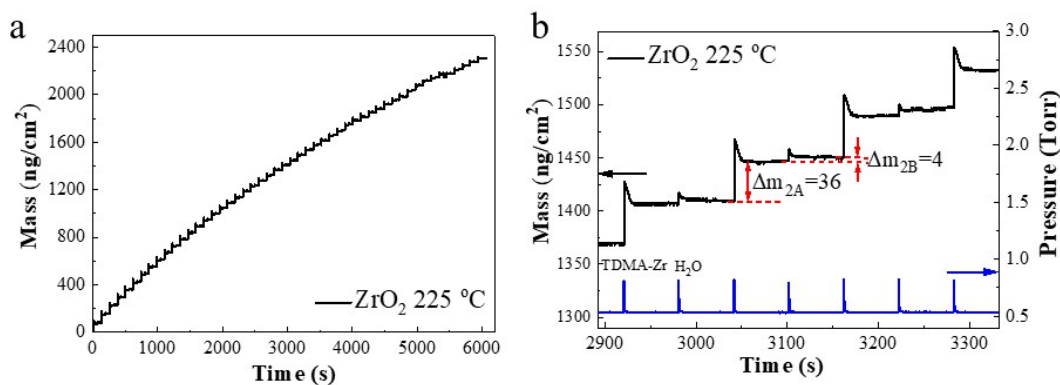

**Figure S3.** *In-situ* QCM measurements of ALD-ZrO<sub>2</sub> using the timing sequence of 0.03 - 60 - 0.015 - 60 s in correspondence to TDMA-Zr-purge-H<sub>2</sub>O-purge, respectively, at 225 °C: (a) 50 consecutive 50 cycles and (b) an enlarged view of 3 consecutive cycles.

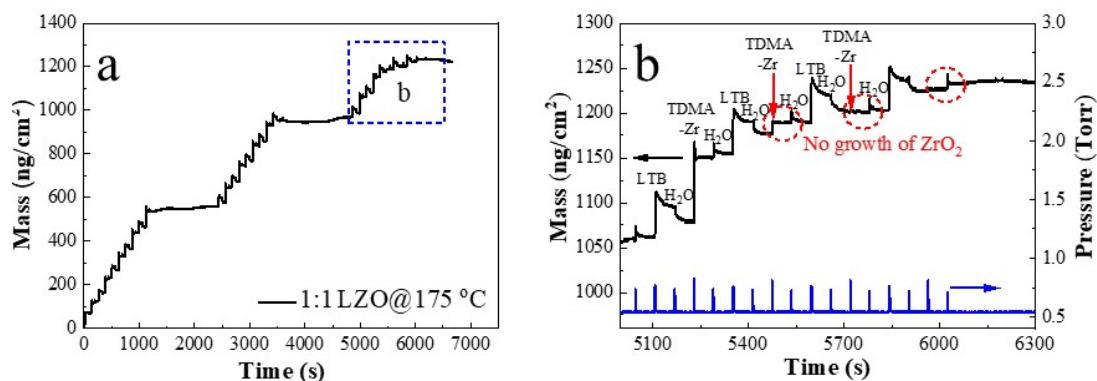

**Figure S4.** *In-situ* QCM measurements of 1:1 ALD-LZO using the timing sequence of LTB (3 s) - 60 s - H<sub>2</sub>O (0.015 s) - 60 s - TDMA-Zr (0.03 s) - 60 s - H<sub>2</sub>O (0.015 s) - 60 s at 175 °C. (a) Consecutive 30 cycles, (b) enlarged view of 3 cycles. The difference from the previous experiment is that after every 10 ALD cycles, a 20 min purging process is added.

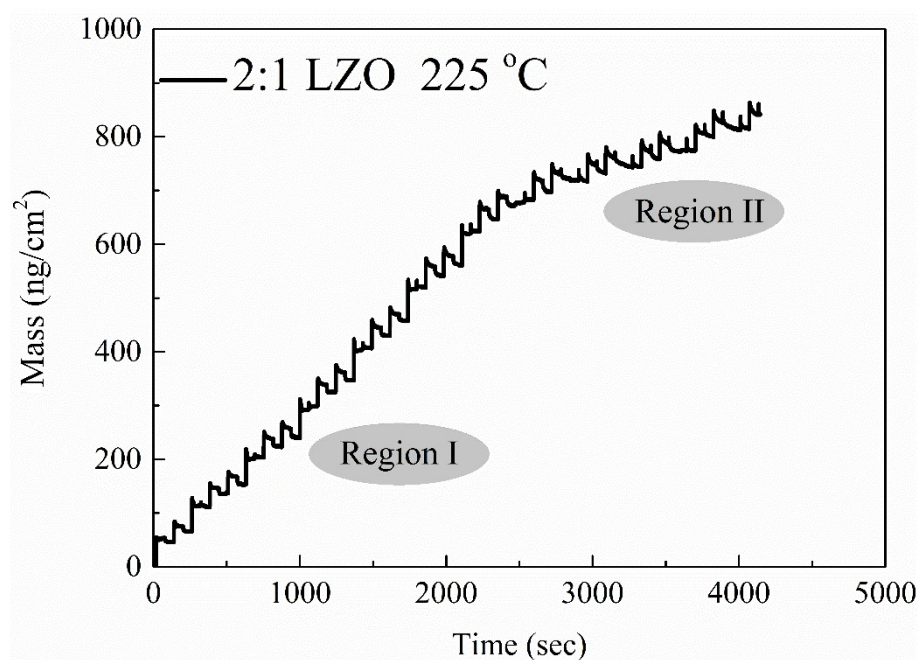

**Figure S5.** *In-situ* QCM measurements of 2:1 ALD-LZO for 10 ALD cycles using the timing sequence of LTB (3 s) - 60 s - H<sub>2</sub>O (0.03 s) - 60 s - LTB (3 s) - 60 s - H<sub>2</sub>O (0.03 s) - 60 s - TDMA-Zr (0.03 s) - 60 s - H<sub>2</sub>O (0.015 s) - 60 s at 225 °C.

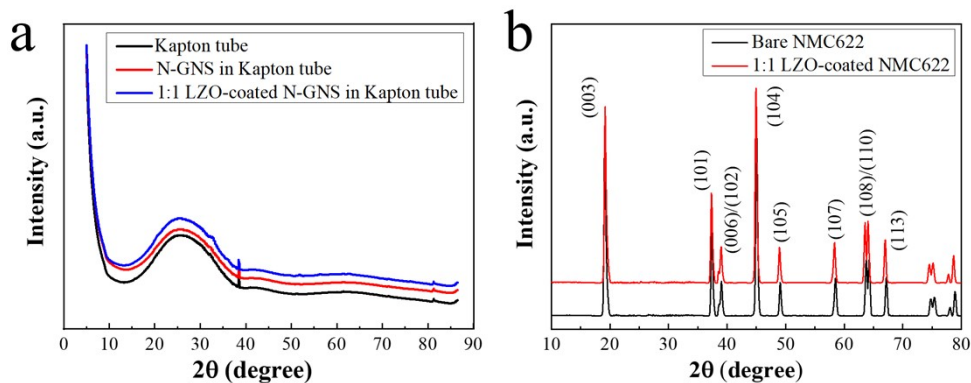

**Figure S6.** (a) XRD spectra of Kapton tube, N-GNS powders in Kapton tube, and 200-cycle 1:1 LZO-coated N-GNS in Kapton tube. (b) XRD spectra of NMC622 powders and 60-cycle 1:1 LZO-coated NMC622 powders.

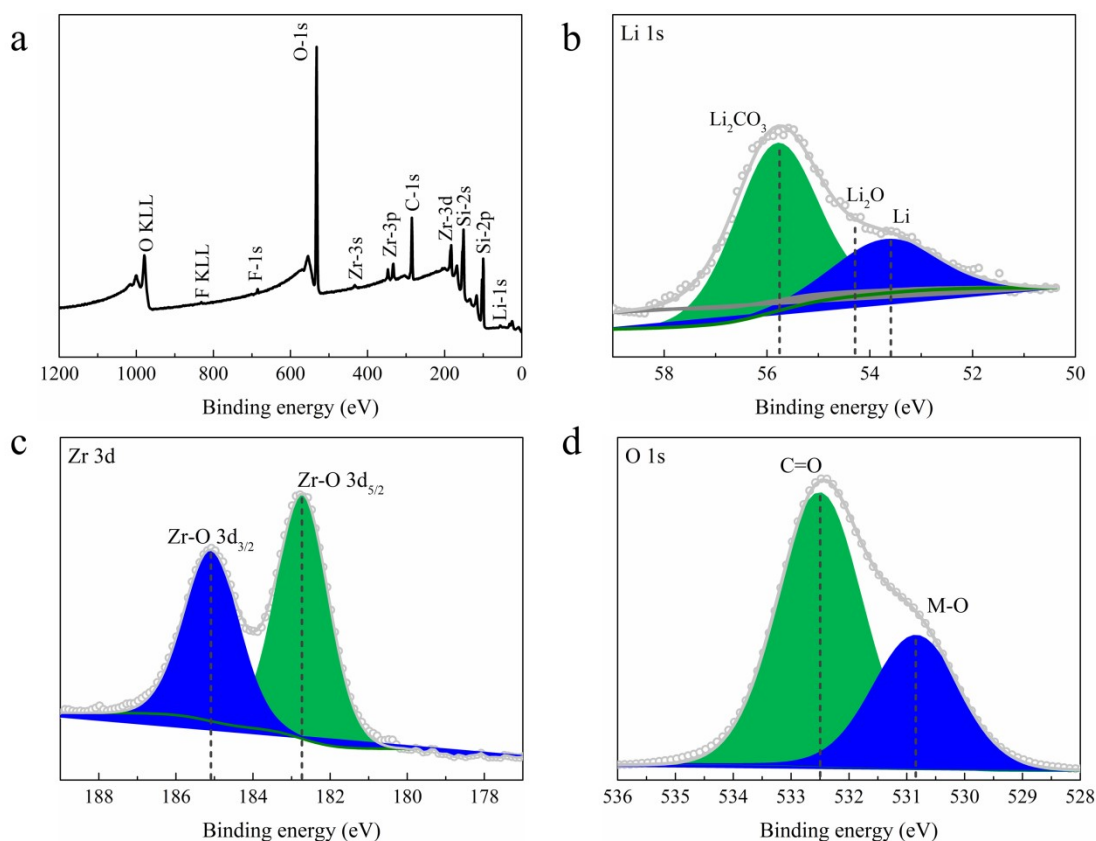

**Figure S7.** (a) X-ray photoelectron spectroscopy (XPS) full spectrum scanning of 1:2 ALD-LZO. (b), (c) and (d) are high-precision XPS spectra of Li1s, Zr3d and O1s respectively.

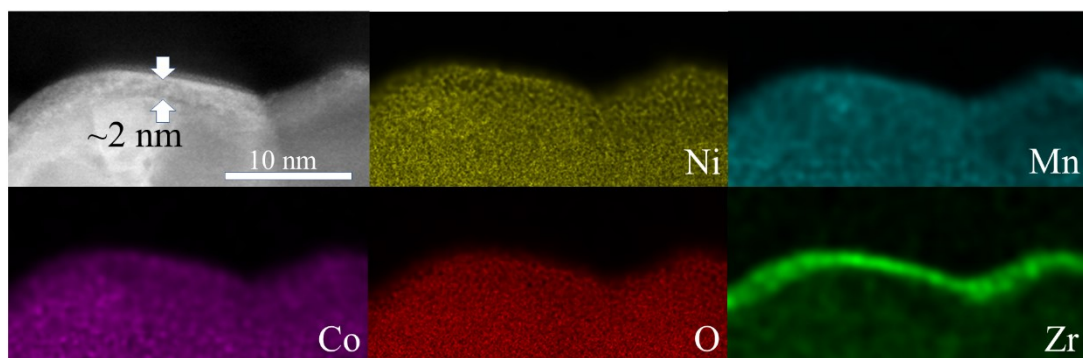

Figure S8. STEM-EDS image and elemental mapping of LZO-coated NMC622.

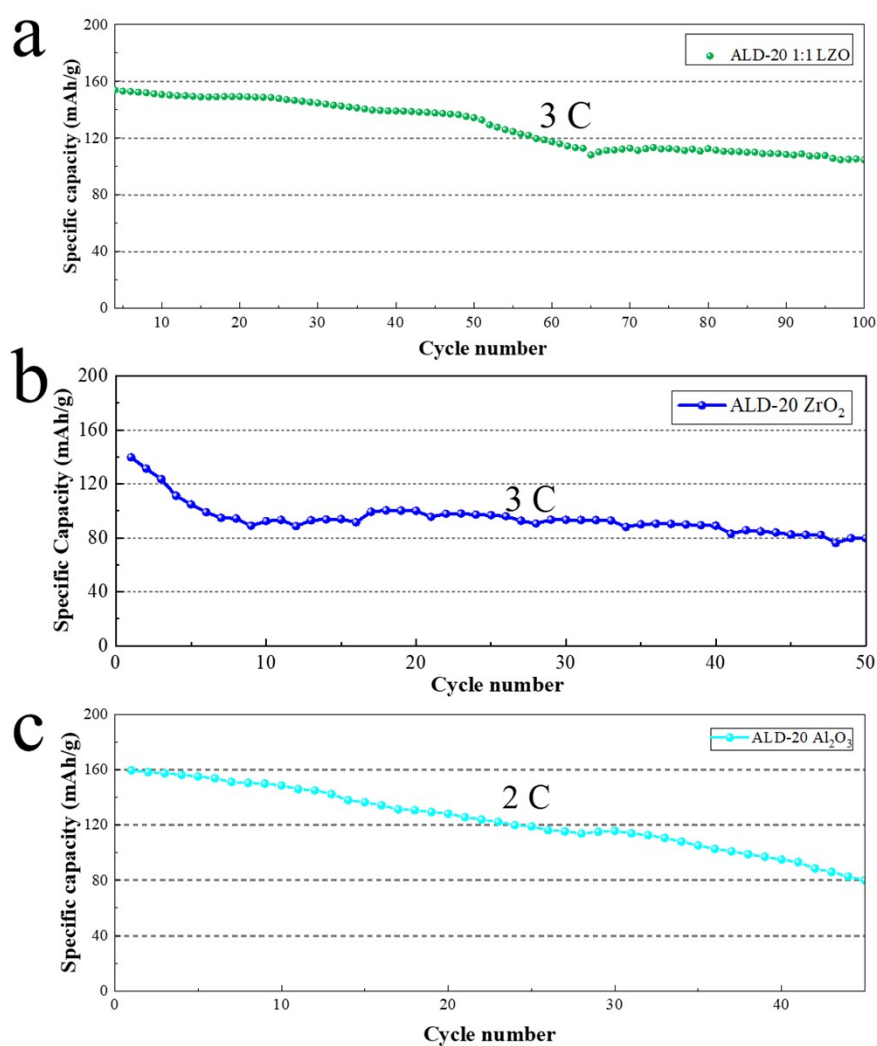

Figure S9. Comparison of the effects of 20-cycle ALD (a) 1:1 LZO, (b) ZrO<sub>2</sub>, and (c) Al<sub>2</sub>O<sub>3</sub> coatings on NMC622 electrodes in the voltage window of 3.0 – 4.5 V in the 3:7 EC:EMC electrolyte. The first two were tested under 3 C while the last was tested under 2 C.

**Table S1.** Element composition and quantitative analysis of 1:2 ALD-LZO

| <i>Name</i> | <i>Peak BE</i> | <i>FWHM eV</i> | <i>Area (P) CPS.eV</i> | <i>Atomic %</i> |
|-------------|----------------|----------------|------------------------|-----------------|
| O1s         | 532.11         | 3.38           | 1736798.41             | 36.79           |
| Si2p        | 100.26         | 3.22           | 600596.23              | 30.59           |
| C1s         | 285.06         | 2.98           | 393932.52              | 20.17           |
| Zr3d        | 183.57         | 3.09           | 273934.79              | 1.46            |
| F1s         | 685.39         | 3.09           | 39810.34               | 0.67            |
| Li1s        | 55.69          | 3.73           | 14055.84               | 10.31           |

**Table S2.** The charge-discharge data of bare and 1:1 ALD-LZO coated NMC622 cathodes at first cycle.

| <i>Sample</i> | <i>Charge capacity<br/>mAh/g</i> | <i>Discharge capacity<br/>mAh/g</i> | <i>Irreversible<br/>capacity%</i> |
|---------------|----------------------------------|-------------------------------------|-----------------------------------|
| Bare          | 224.7                            | 184.4                               | 17.9%                             |
| ALD-10        | 219.9                            | 194.9                               | 11.3%                             |
| ALD-20        | 223.9                            | 189.0                               | 15.6%                             |
| ALD-40        | 219.3                            | 193.9                               | 11.6%                             |
| ALD-60        | 219.5                            | 188.6                               | 14.1%                             |
